# Supplementary material for: Effects of metal cation doping in CeO2 support on catalytic methane steam reforming at low temperature in an electric field
Source: Royal Society of Chemistry journal article supplement (doi:10.1039/d0ra01721c), 2020-01-01
Supplement: d0ra01721c1.pdf [file d0ra01721c1.pdf]

**ESI (electronic supplementary information)**

**Title:**

Effects of metal cation doping in CeO<sub>2</sub> support on catalytic methane steam reforming at low temperature in an electric field

**Authors:**

Ayako Takahashi<sup>a</sup>, Reona Inagaki<sup>a</sup>, Maki Torimoto<sup>a</sup>, Yudai Hisai<sup>a</sup>, Taku Matsuda<sup>a</sup>, Quanbao Ma<sup>b</sup>, Jeong Gil Seo<sup>c</sup>, Takuma Higo<sup>a</sup>, Hideaki Tsuneki<sup>a</sup>, Shuhei Ogo<sup>a</sup>, Truls Norby<sup>b</sup>, Yasushi Sekine<sup>a,\*</sup>

**Affiliation:**

<sup>a</sup> Department of Applied Chemistry, Waseda University, 3-4-1, Okubo, Shinjuku, Tokyo, 169-8555, Japan

<sup>b</sup> Department of Chemistry, University of Oslo, FERMiO, Gaustadalléen 21, NO-0349, Oslo, Norway

<sup>c</sup> Department of Energy Science and Technology, Myongji University, Nam-dong, Cheoin-gu, Yongin-si, Gyeonggi-do 449-728, South Korea

**Corresponding Author:**

E-mail: ysekine@waseda.jp (Y. Sekine)

## Selection of support

For EIS measurements, CeO<sub>2</sub> and Al-CeO<sub>2</sub> pellets were prepared in the following steps. First, CeO<sub>2</sub> and Al-CeO<sub>2</sub> powders were synthesized following the same procedure of 2.1. The both of dried-up powders were pre-calcined at 673 K for 2 h, then calcined at 1123 K for 10 h. CeO<sub>2</sub> powder was pressed at 60 kN for 4 min and sintered at 1273 K for 2 h with the heating ramp rate 5 K min<sup>-1</sup> in ambient air. Al-CeO<sub>2</sub> powder was pressed at 60 kN for 2 min and sintered at 1323 K for 3 h with the heating ramp rate 5 K min<sup>-1</sup> in ambient air. The diameter and the thickness of calcined CeO<sub>2</sub> pellet were 17.8 mm and 0.85 mm, while these of Al-CeO<sub>2</sub> pellet were 17.4 mm and 1.00 mm, respectively. The relative density of pellet was calculated as 62.0% for CeO<sub>2</sub> and 59.6% for Al-CeO<sub>2</sub> from each sample's weight and geometry. At last, circular Pt electrodes were painted on both sides using Pt ink (Pt ink number 356010; Nilaco Corp.) and annealed at 1173 K for 1 h with the heating ramp rate 4 K min<sup>-1</sup> in ambient air.

The difference in adsorbed H<sub>2</sub>O amount between Pd/CeO<sub>2</sub> and Pd/Al-CeO<sub>2</sub> may attribute to the difference in the physical property of catalyst support. To clarify that, lattice strain and crystalline phase of samples were investigated using XRD measurement and Raman spectroscopy. Figure. S6 represents the XRD patterns of (A) catalyst supports and (B) 1.0wt%Pd loaded catalysts. Comparing the XRD patterns of CeO<sub>2</sub> and Al-CeO<sub>2</sub>, it was confirmed that the crystal structure was maintained as fluorite type even though Al was doped to CeO<sub>2</sub>. Raman spectra of CeO<sub>2</sub> and Al-CeO<sub>2</sub> are shown in Fig. S7. As a result, both samples showed a peak around 460 cm<sup>-1</sup>, which is assignable to F<sub>2g</sub> mode of CeO<sub>2</sub>.<sup>S1</sup> Both Raman and XRD results indicated that the crystallinity decreased by Al doping to CeO<sub>2</sub>, since the peaks of Al-CeO<sub>2</sub> got broader and its intensity diminished. Therefore, the crystal structure was suggested to be distorted by Al doping to CeO<sub>2</sub>, and this detorsion may have a role for obtaining larger adsorbed H<sub>2</sub>O amount. Additionally, from the ICP-OES measurements, the actual

molar ratio of Al/Ce was 0.1238. This ratio was roughly in agreement with the theoretical amount. The crystal structure of Pd/Al-CeO<sub>2</sub> is distorted even with such a small amount of doping Al, which caused a significant increase in the amount of H<sub>2</sub>O adsorption.

S1 Z.D. Dohčević-Mitrović, M.J. Šćepanović, M.U. Grujić-Brojčin, Z.V. Popović, S.B. Bosković, B.M. Matović, M.V. Zinkevich and F. Aldinger, *Solid State Commun.*, 2006, **137**, 387–390.

S2 Bin Wang, Duan Weng, Xiaodong Wu, Rui Ran, *Appl. Surface Science*, 2011, **257**, 3878–3883.

S3 Xiu-Ge Zhao, Qian Lin, Wen-De Xiao, *Appl. Catal. A: General*, 2005, **284**, 253–257.

**Table S1.** Catalytic activity without EF; catalyst, 1.0 wt% Pd/M-CeO<sub>2</sub> (M=Ca, Ba, La, Y or Al); flow, CH<sub>4</sub> : H<sub>2</sub>O : Ar = 1 : 2 : 7; total flow rate, 120 SCCM; furnace temperature, 523 – 723 K; current, 0 mA.

| Dopant | $T_{\text{thermocouple}}$<br>/ K | $r_{(\text{CO}+\text{CO}_2)}$<br>/ mmol min <sup>-1</sup> | Conv.<br>/ % | $E_a$<br>/ kJ mol <sup>-1</sup> |
|--------|----------------------------------|-----------------------------------------------------------|--------------|---------------------------------|
| -      | 573                              | 0.00565                                                   | 1.10         | 63.3                            |
|        | 668                              | 0.0398                                                    | 7.24         |                                 |
|        | 715                              | 0.0777                                                    | 14.4         |                                 |
| Ca     | 569                              | 0.00469                                                   | 0.925        | 68.5                            |
|        | 671                              | 0.0382                                                    | 6.86         |                                 |
|        | 724                              | 0.110                                                     | 16.8         |                                 |
| Ba     | 570                              | 0.00387                                                   | 0.781        | 65.0                            |
|        | 669                              | 0.0329                                                    | 5.79         |                                 |
|        | 723                              | 0.0677                                                    | 11.8         |                                 |
| La     | 577                              | 0.00608                                                   | 1.21         | 61.3                            |
|        | 673                              | 0.0432                                                    | 8.07         |                                 |
|        | 720                              | 0.0738                                                    | 14.0         |                                 |
| Y      | 570                              | 0.00596                                                   | 1.17         | 63.3                            |
|        | 673                              | 0.0499                                                    | 8.77         |                                 |
|        | 720                              | 0.0932                                                    | 16.7         |                                 |
| Al     | 576                              | 0.00577                                                   | 1.20         | 63.1                            |
|        | 675                              | 0.0477                                                    | 8.64         |                                 |
|        | 723                              | 0.0802                                                    | 14.4         |                                 |

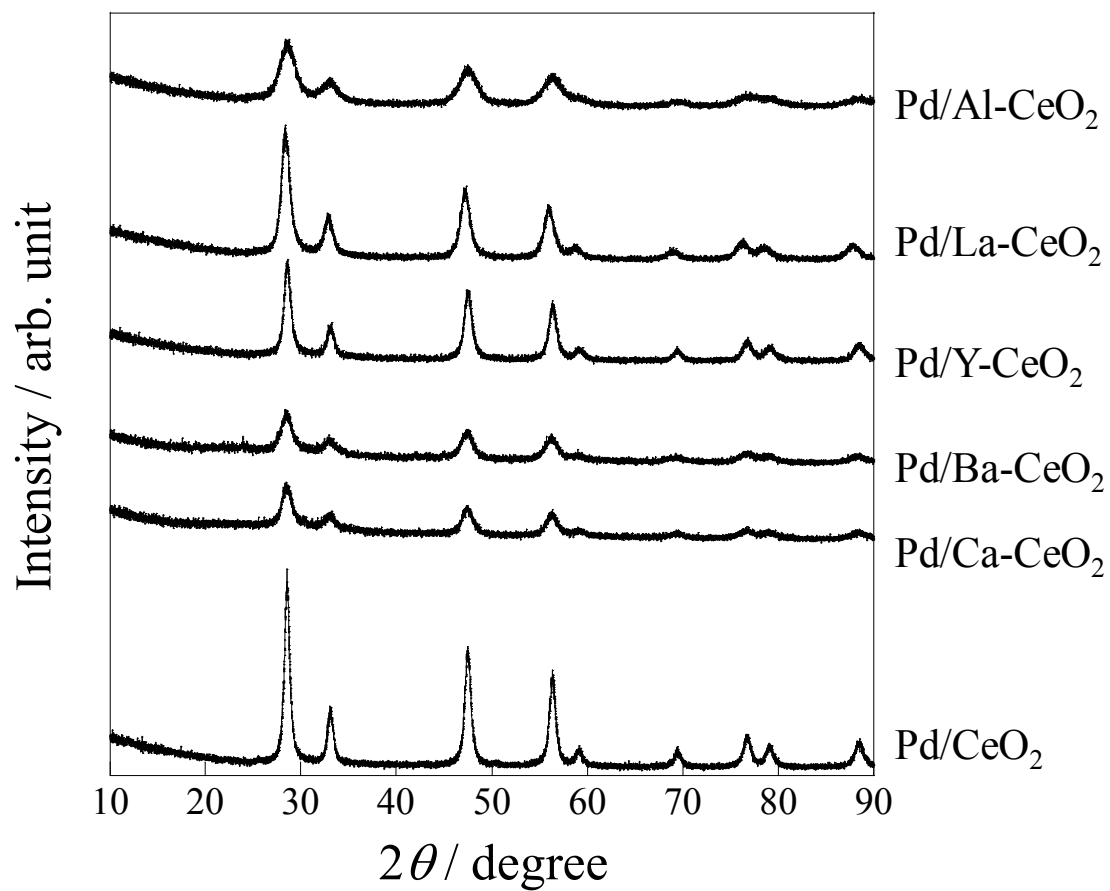

**Fig. S1.** XRD patterns of 1.0 wt% Pd supported M-CeO<sub>2</sub> (M = None, Ca, Ba, Y, La or Al).

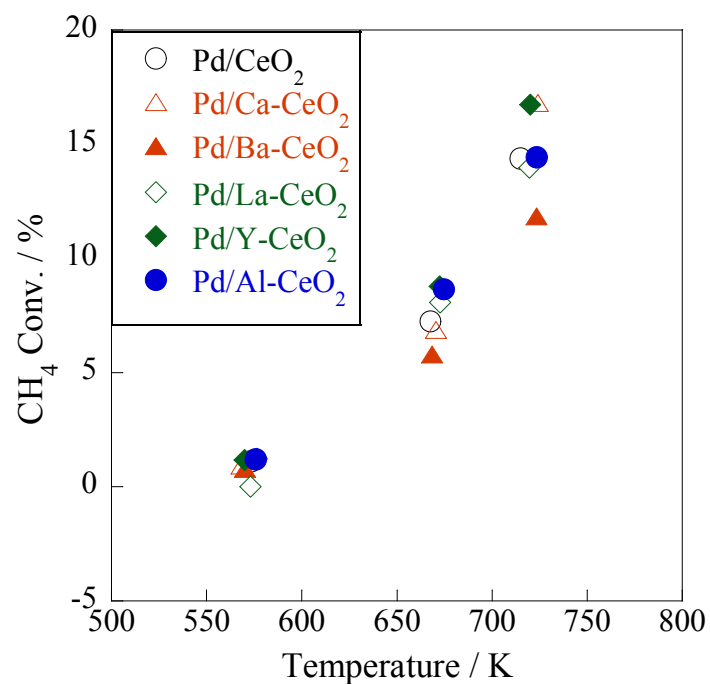

Fig. S2. Catalytic activity without the electric field at 523–723 K.

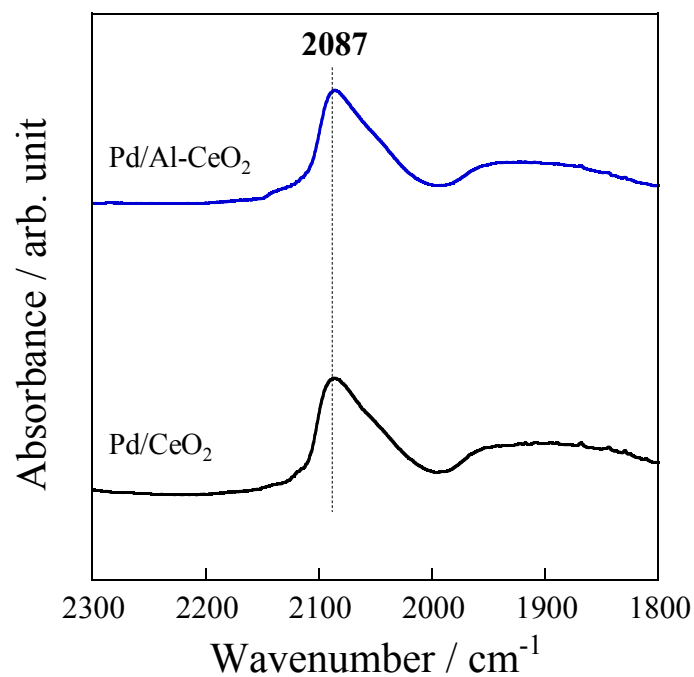

Fig. S3. FT-IR spectra of CO adsorption on 1.0wt%Pd/CeO<sub>2</sub> or 1.0wt%Pd/Al-CeO<sub>2</sub>; flow, CO : Ar =  $x : 65-x$  ( $x=0, 5$ ); total flow rate, 65 SCCM, temperature, 373 K.

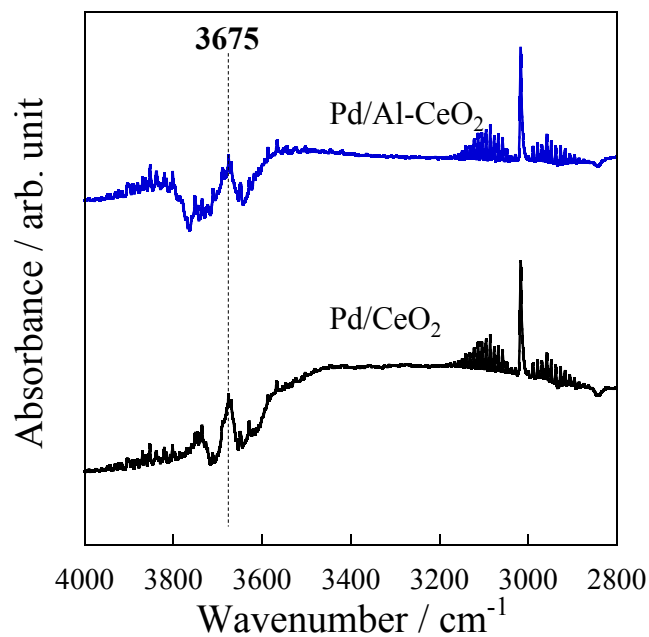

**Fig. S4.** *In-situ* DRIFTS spectra of adsorbed H<sub>2</sub>O on Pd/CeO<sub>2</sub> and Pd/Al-CeO<sub>2</sub> at 473 K.

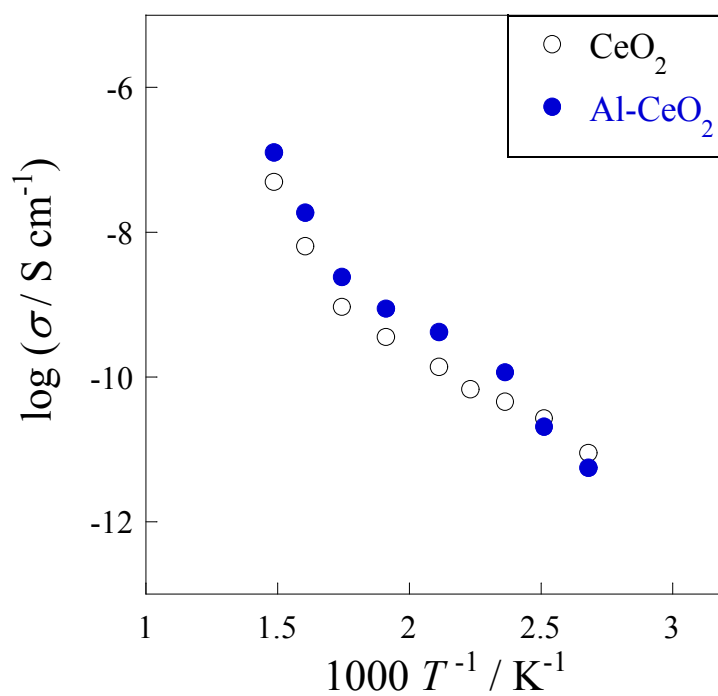

**Fig. S5.** Temperature dependence of electrical conductivity of CeO<sub>2</sub> and Al-CeO<sub>2</sub> under dry condition (Ar).

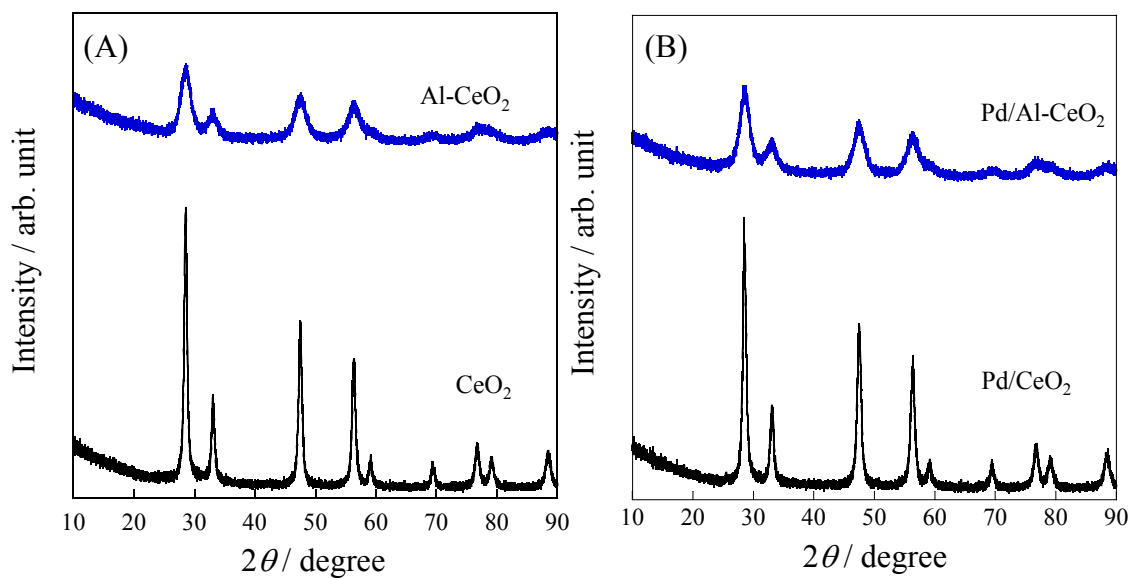

Fig. S6. XRD patterns of (A) bare and (B) 1.0 wt% Pd supported CeO<sub>2</sub> and Al-CeO<sub>2</sub>.

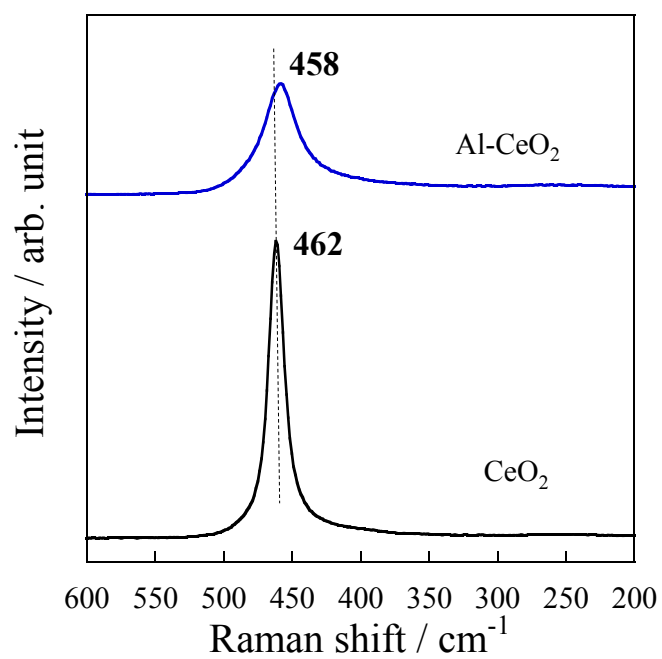

Fig. S7. Raman spectra of CeO<sub>2</sub> and Al-CeO<sub>2</sub>
